# Supplementary material for: Examining the implications of photochemical indicators for O 3 –NO x –VOC sensitivity and control strategies: a case study in the Yangtze River Delta (YRD), China
Source: Copernicus journal article supplement (doi:10.5194/acp-22-14799-2022), 2022-11-22
Supplement: Supplementary file 1 [file acp-22-14799-2022-supplement.pdf]

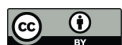

*Supplement of*

## **Examining the implications of photochemical indicators for $O_3$ – $NO_x$ –VOC sensitivity and control strategies: a case study in the Yangtze River Delta (YRD), China**

**Xun Li et al.**

*Correspondence to:* Momei Qin (momei.qin@nuist.edu.cn) and Jianlin Hu (jianlinhu@nuist.edu.cn)

The copyright of individual parts of the supplement might differ from the article licence.

## Supplementary tables

**Table S1** Evaluation of model performance on hourly O<sub>3</sub> in thirteen cities in Jiangsu Province.

10 The red indicates the metric values exceed the criteria recommended by Emery et al. (2017).

|             | NMB | NME | r    |
|-------------|-----|-----|------|
| Nanjing     | 13% | 24% | 0.93 |
| Wuxi        | 7%  | 17% | 0.81 |
| Xuzhou      | 2%  | 23% | 0.64 |
| Changzhou   | 12% | 21% | 0.92 |
| Suzhou      | 13% | 22% | 0.72 |
| Nantong     | 17% | 24% | 0.83 |
| Lianyungang | 14% | 22% | 0.53 |
| Huaian      | 8%  | 22% | 0.70 |
| Yancheng    | 14% | 23% | 0.57 |
| Yangzhou    | -2% | 29% | 0.70 |
| Zhenjiang   | 9%  | 26% | 0.77 |
| Taizhou     | 12% | 27% | 0.66 |
| Suqian      | -1% | 21% | 0.73 |

**Table S2** The fractions of VOC-limited, NO<sub>x</sub>-limited, and transitional regimes identified by each indicator in the area in Jiangsu.

|                                      | VOC-limited regime | NO <sub>x</sub> -limited regime | Transitional regime |
|--------------------------------------|--------------------|---------------------------------|---------------------|
| P <sub>H2O2</sub> /P <sub>HNO3</sub> | 12.7%              | 82.2%                           | 5.1%                |
| HCHO/NO <sub>2</sub>                 | 5.2%               | 81.8%                           | 13.0%               |
| HCHO/NO <sub>y</sub>                 | 4.0%               | 80.8%                           | 15.2%               |
| NO <sub>y</sub>                      | 2.4%               | 84.1%                           | 13.5%               |

## Supplementary figures

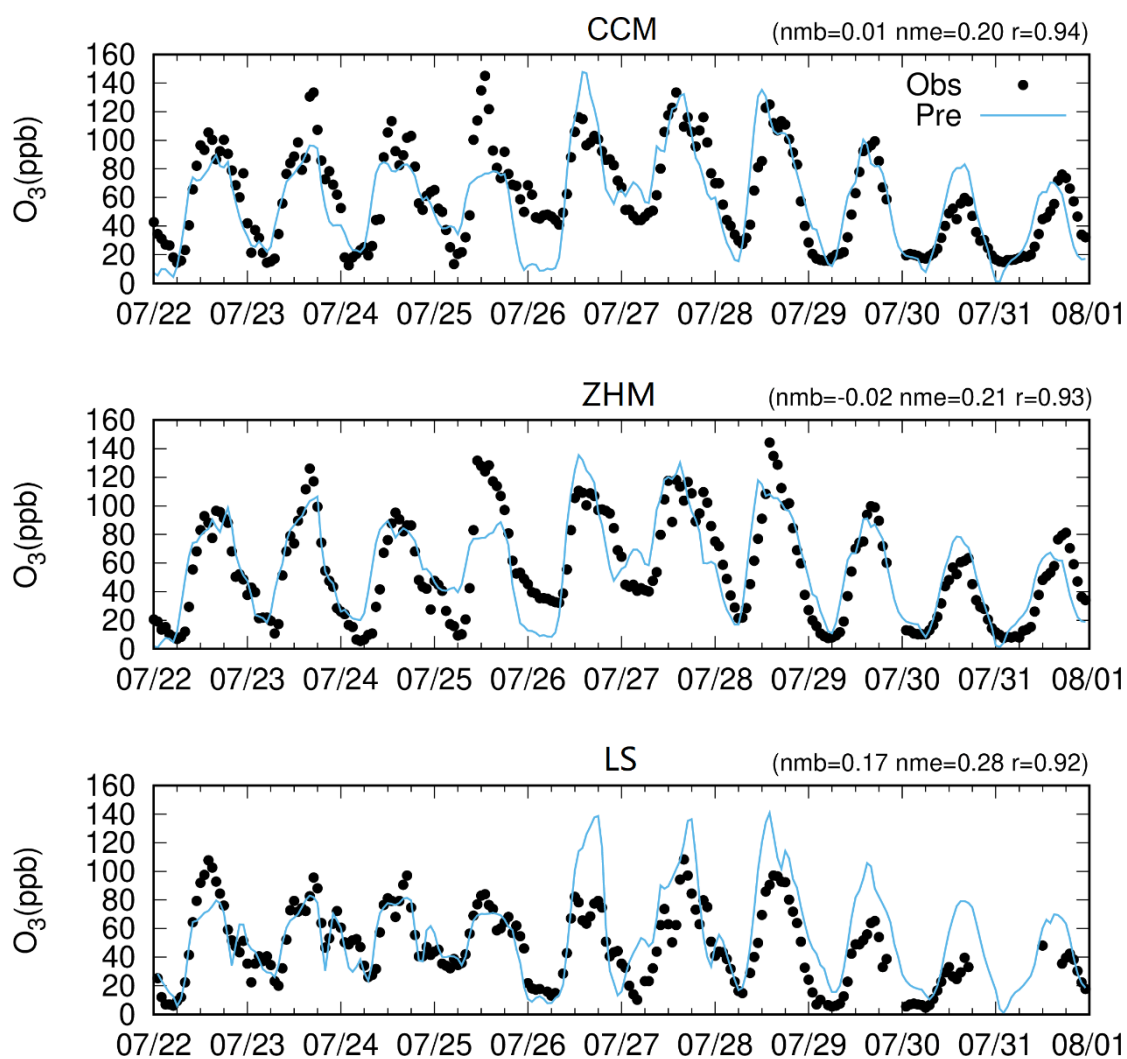

20 **Figure S1** Comparison of the observed (black dots) and simulated (blue lines) O<sub>3</sub> at the three representative sites (CCM, ZHM, LS) during July 22–31 in 2017. The values of evaluation metrics (NMB, NME and r) are given at the upper right corner of each panel.

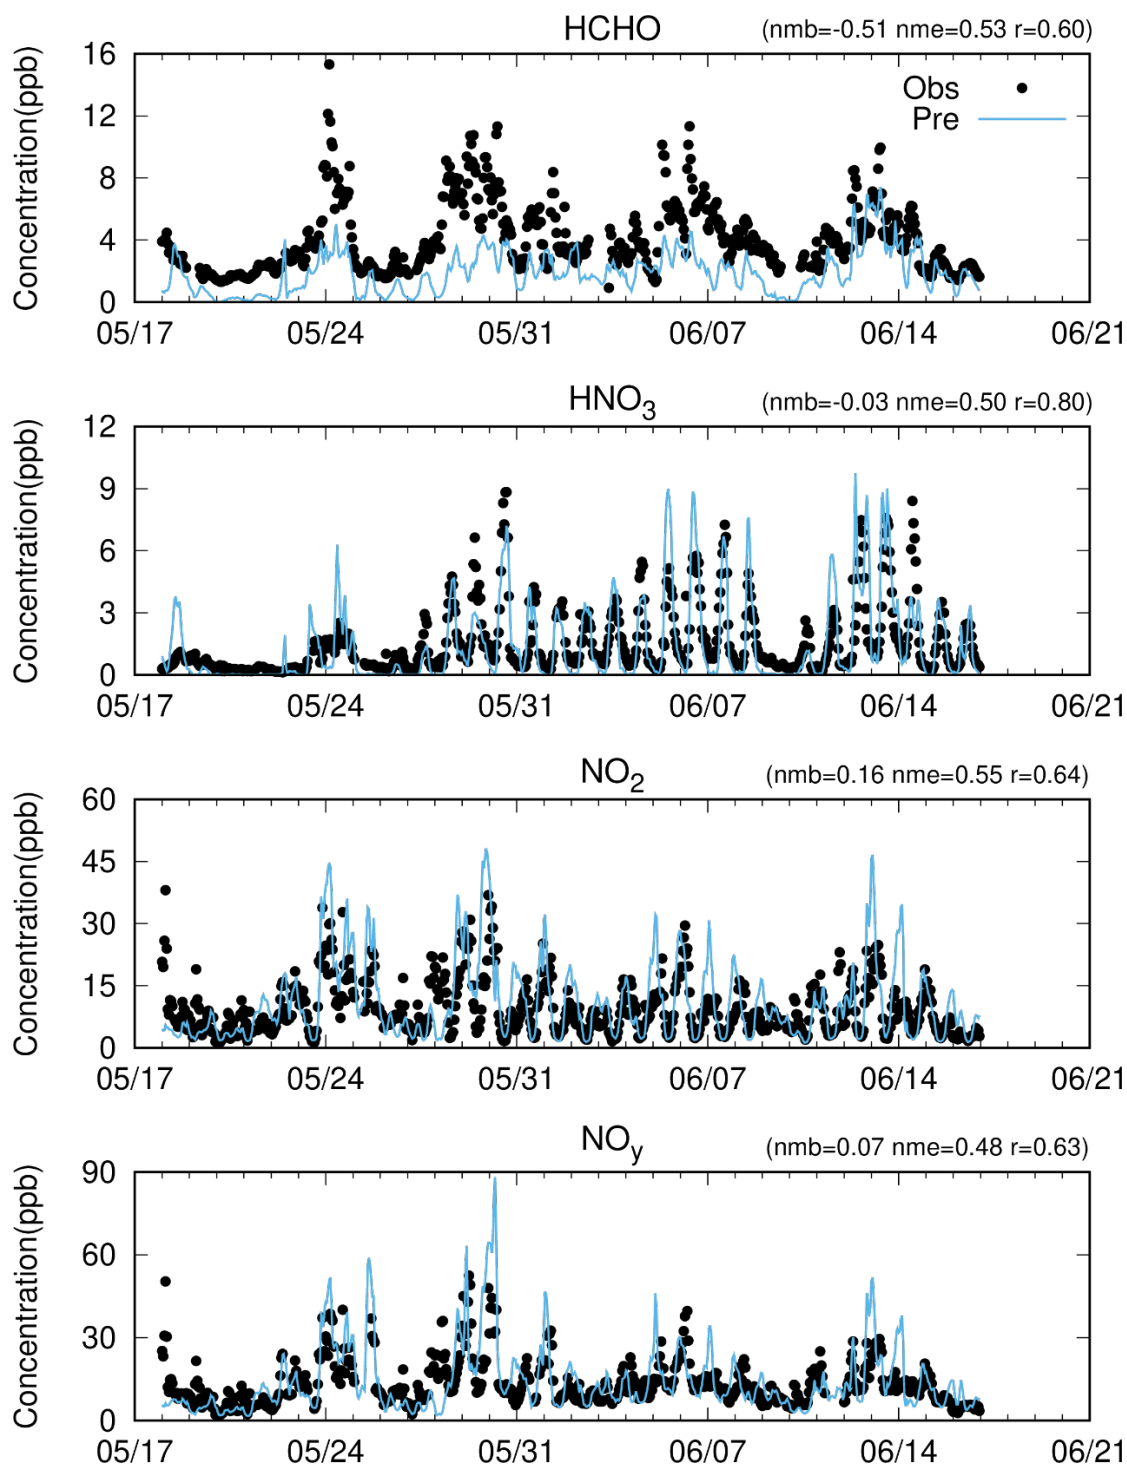

25

**Figure S2** Comparison of the observed (black dots) and simulated (blue lines) HCHO, HNO<sub>3</sub>, NO<sub>2</sub>, and NO<sub>y</sub> at the Taizhou site (32°35'N, 119°57'E) during the EXPLORE-YRD campaign (from May 17 to June 20 in 2018). The values of evaluation metrics (NMB, NME, and r) are given at the upper right corner of each panel.

30

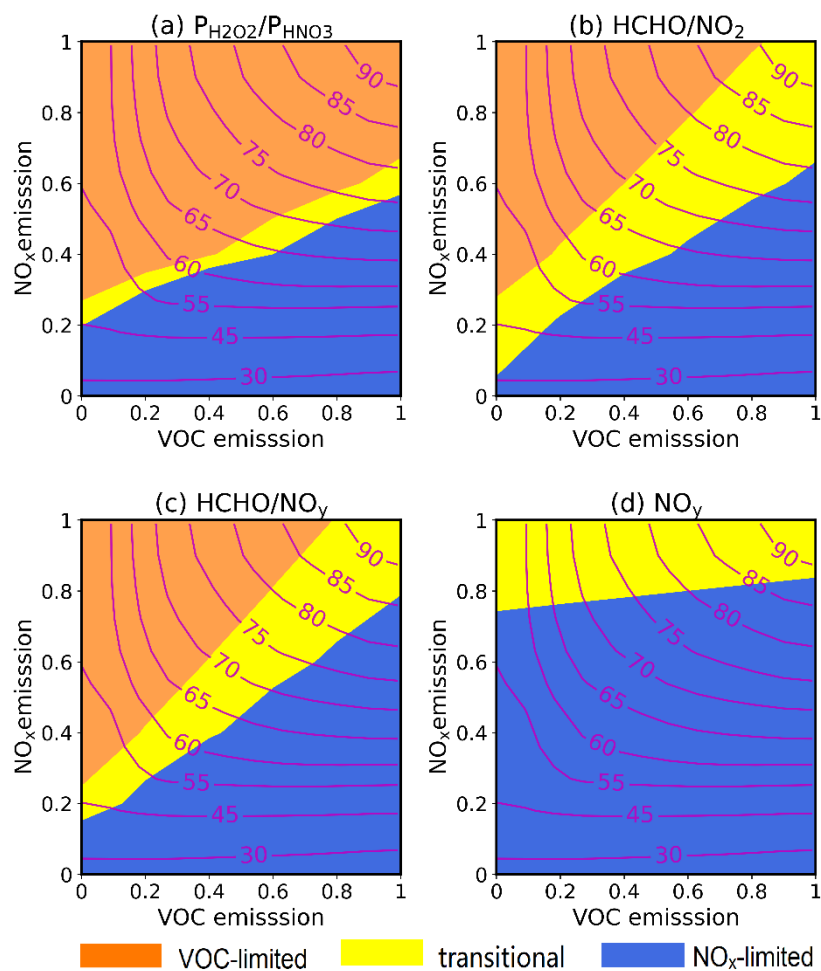

**Figure S3** O<sub>3</sub> isopleths (red lines) overlap with the O<sub>3</sub> formation regimes (shading color) identified with  $P_{\text{H}_2\text{O}_2}/P_{\text{HNO}_3}$  (a), HCHO/NO<sub>2</sub> (b), HCHO/NO<sub>y</sub> (c), and NO<sub>y</sub> (d) at the ZHM site.

35 The orange indicates a VOC-limited regime. The yellow indicates a transitional regime, and the blue indicates a NO<sub>x</sub>-limited regime.

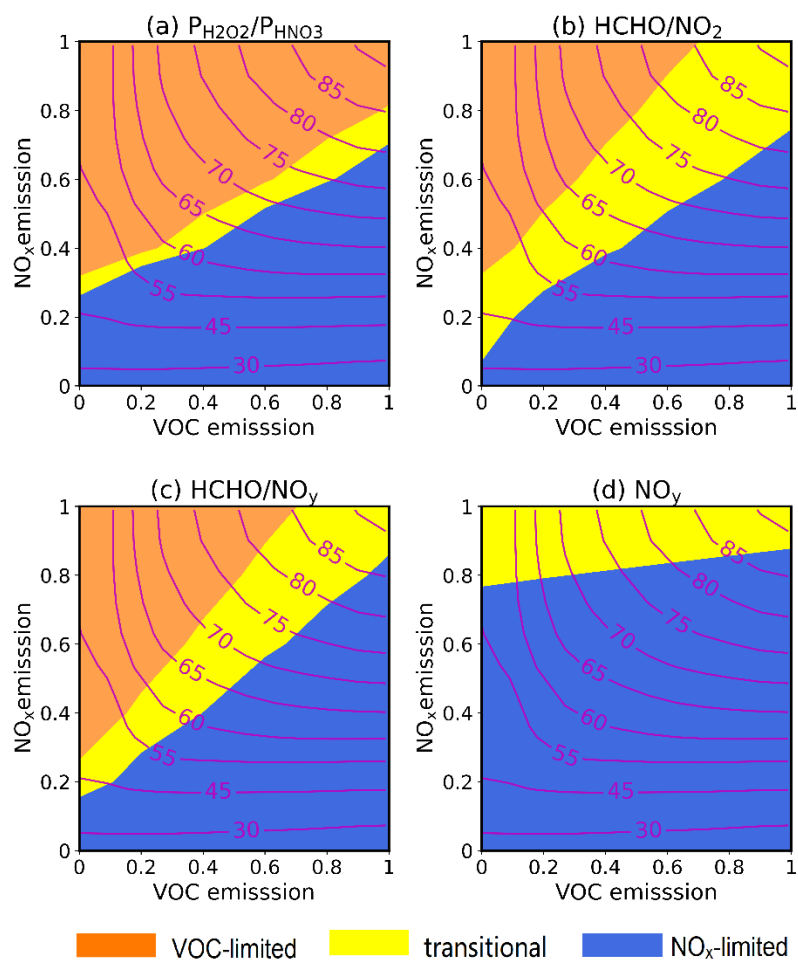

**Figure S4** O<sub>3</sub> isopleths (red lines) overlap with the O<sub>3</sub> formation regimes (shading color) identified with P<sub>H<sub>2</sub>O<sub>2</sub></sub>/P<sub>HNO<sub>3</sub></sub> (a), HCHO/NO<sub>2</sub> (b), HCHO/NO<sub>y</sub> (c), and NO<sub>y</sub> (d) at the LS site. The orange indicates a VOC-limited regime. The yellow indicates a transitional regime, and the blue indicates a NO<sub>x</sub>-limited regime.

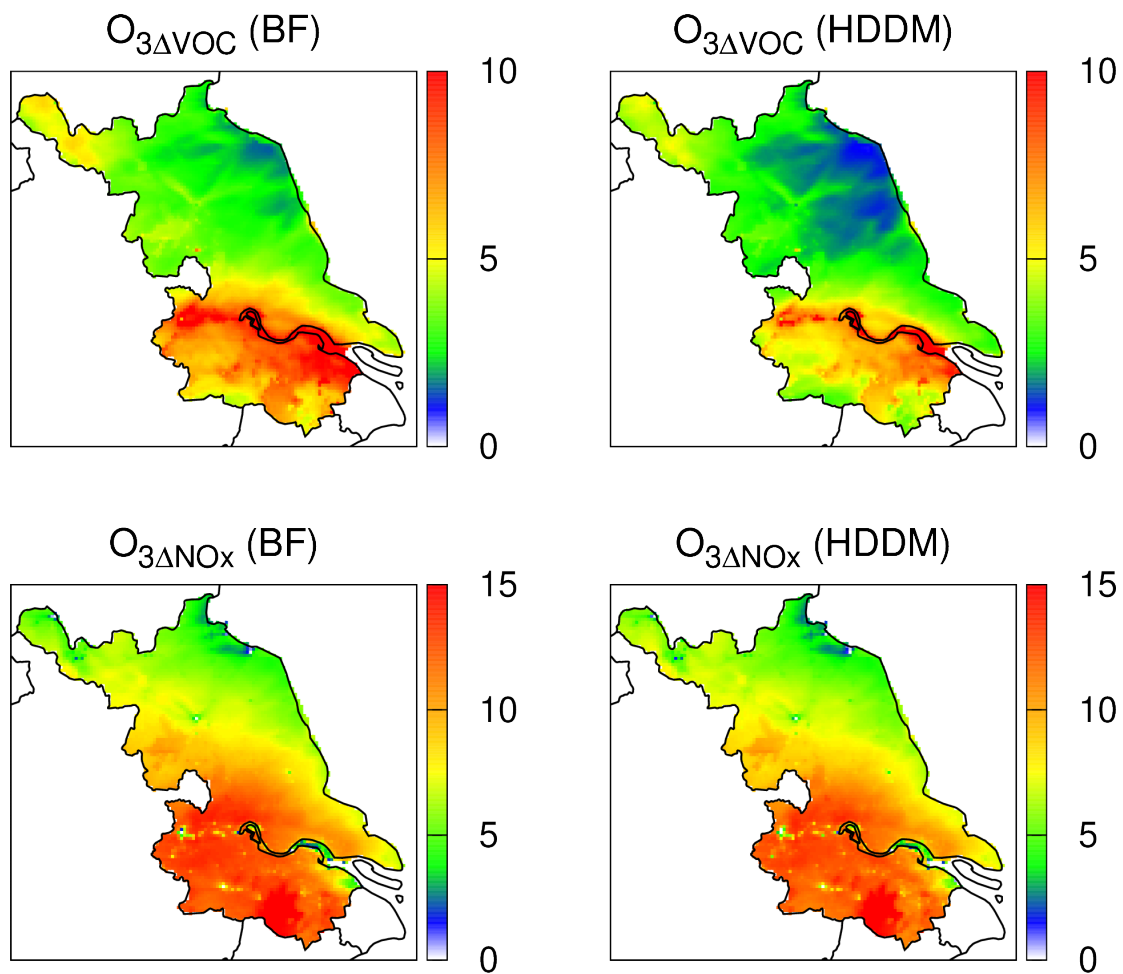

**Figure S5** Spatial distributions of  $O_3$  changes (in unit of ppb) resulting from a 35% reduction  
 45 in VOC or  $NO_x$  emissions with perturbed simulations (left column) or Taylor expansions with  
 first- and second-order sensitivity coefficients in the HDDM (right column).



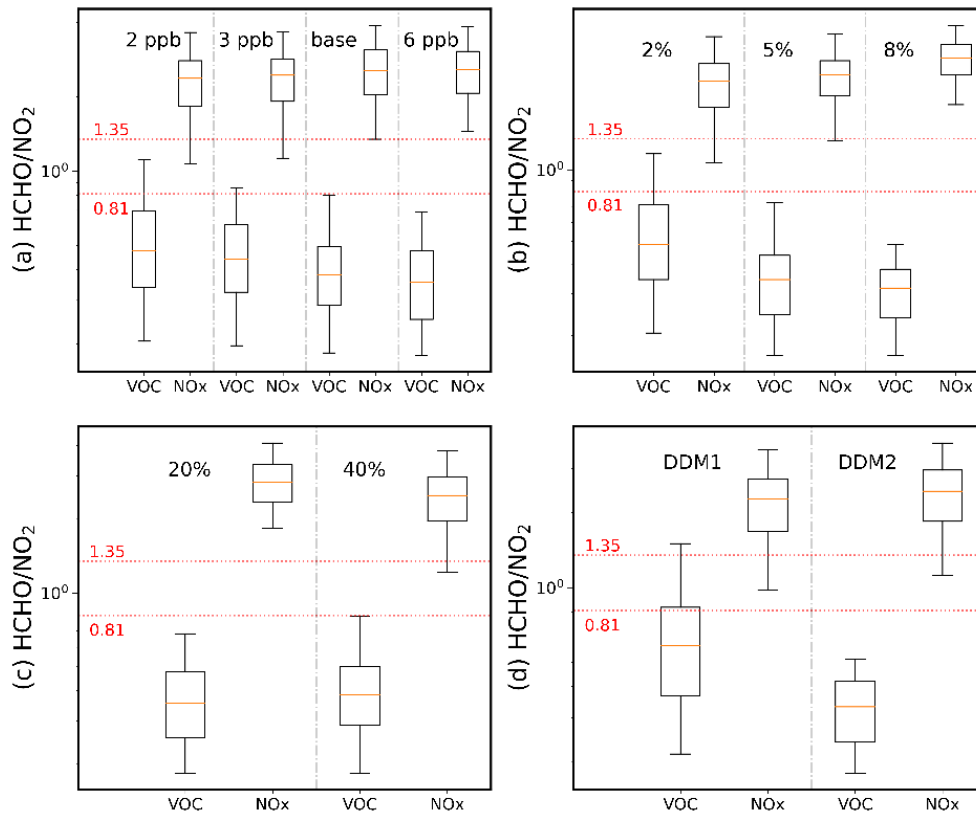

**Figure S6** The percentile distributions of the HCHO/NO<sub>2</sub> values at the VOC- or NO<sub>x</sub>-limited grid cells with different setups in methodology. The threshold intervals of HCHO/NO<sub>2</sub> in Table

50 3 are indicated with red dotted lines.

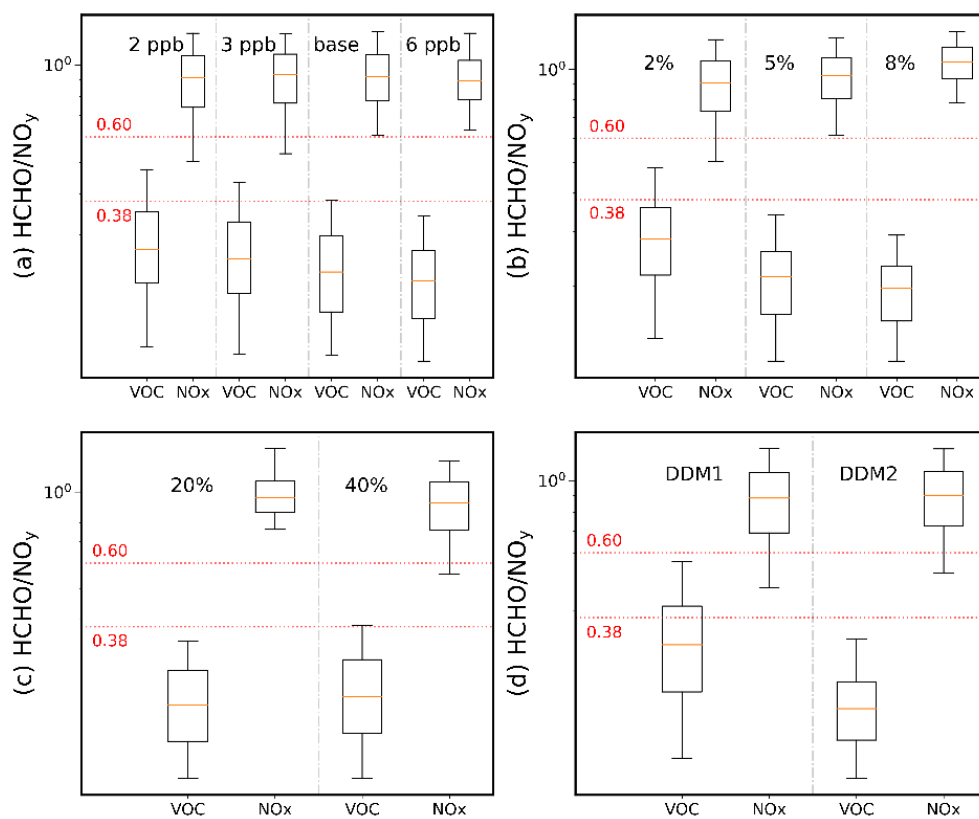

**Figure S7** The percentile distributions of the HCHO/NO<sub>y</sub> values at the VOC- or NO<sub>x</sub>-limited grid cells with different setups in methodology. The threshold intervals of HCHO/NO<sub>y</sub> in Table

55 3 are indicated with red dotted lines.

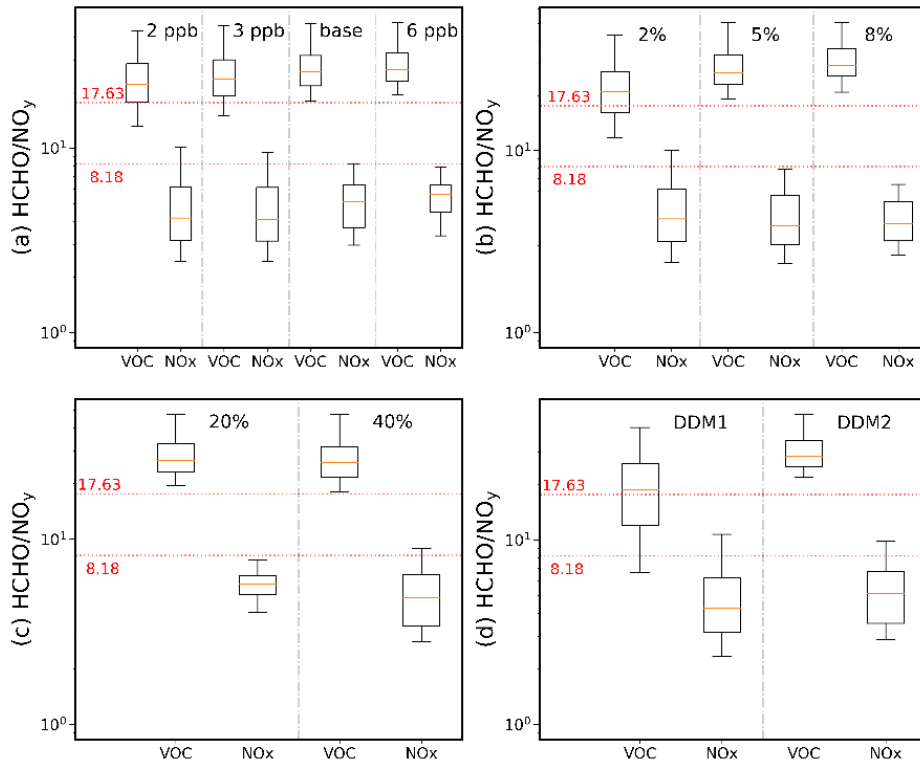

**Figure S8** The percentile distributions of the  $\text{NO}_y$  values at the VOC- or  $\text{NO}_x$ -limited grid cells with different setups in methodology. The threshold intervals of  $\text{NO}_y$  in Table 3 are indicated with red dotted lines.

60
